# Supplementary material for: Monolayer MoS2 growth at the Au–SiO2 interface
Source: Royal Society of Chemistry journal article supplement (doi:10.1039/c9nr05119h), 2019-01-01

# Monolayer MoS<sub>2</sub> Growth at Au-SiO<sub>2</sub> Interface

Hong En Lim,<sup>\*a</sup> Toshifumi Irisawa,<sup>\*b</sup> Naoya Okada,<sup>b</sup> Mitsuhiro Okada,<sup>c</sup> Takahiko Endo,<sup>a</sup>  
Yusuke Nakanishi,<sup>a</sup> Yutaka Maniwa,<sup>a</sup> and Yasumitsu Miyata<sup>\*a</sup>

<sup>a</sup> Department of Physics, Tokyo Metropolitan University, Hachioji, Tokyo 192-0397, Japan

<sup>b</sup> Nanoelectronics Research Institute (NeRI), National Institute of Advanced Industrial  
Science and Technology (AIST), Tsukuba, Ibaraki 305-8568, Japan

<sup>c</sup> Nanomaterials Research Institute (NMRI), National Institute of Advanced Industrial Science  
and Technology (AIST), Tsukuba, Ibaraki 305-8565, Japan

## Corresponding Authors

\*Email (H. E. Lim): [lim@tmu.ac.jp](mailto:lim@tmu.ac.jp)

\*Email (T. Irisawa): [toshifumi1.irisawa@aist.go.jp](mailto:toshifumi1.irisawa@aist.go.jp)

\*Email (Y. Miyata): [ymiyata@tmu.ac.jp](mailto:y Miyata@tmu.ac.jp)

## Supplementary Figures

**Figure S1. Topographic images of the MoS<sub>2</sub> sheet.** (a) Topographic image of the MoS<sub>2</sub> sample in Fig. 2b, and (b) magnified view of region outlined in (a). Yellow line in (b) indicates where the spatial topographic height profile in (c) was extracted.

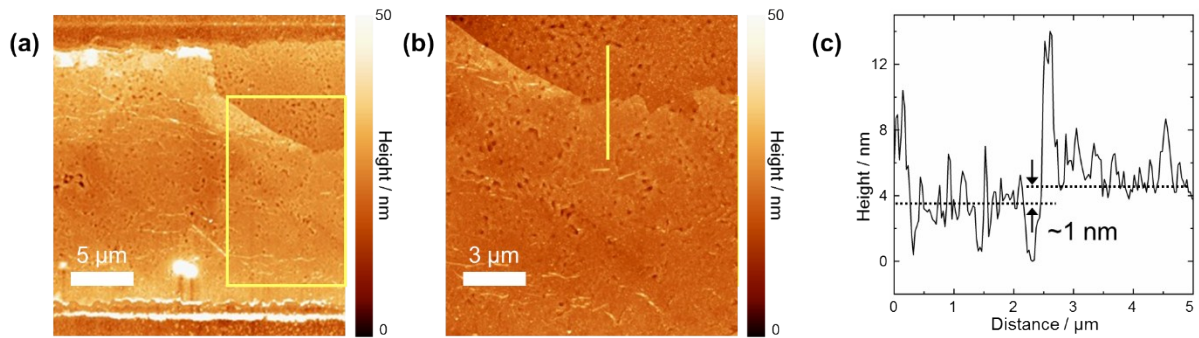

**Figure S2. Cross-sectional TEM images of Au blocks.** (a, b) Au blocks after CVD reaction at different locations. Scale bars are 500 nm.

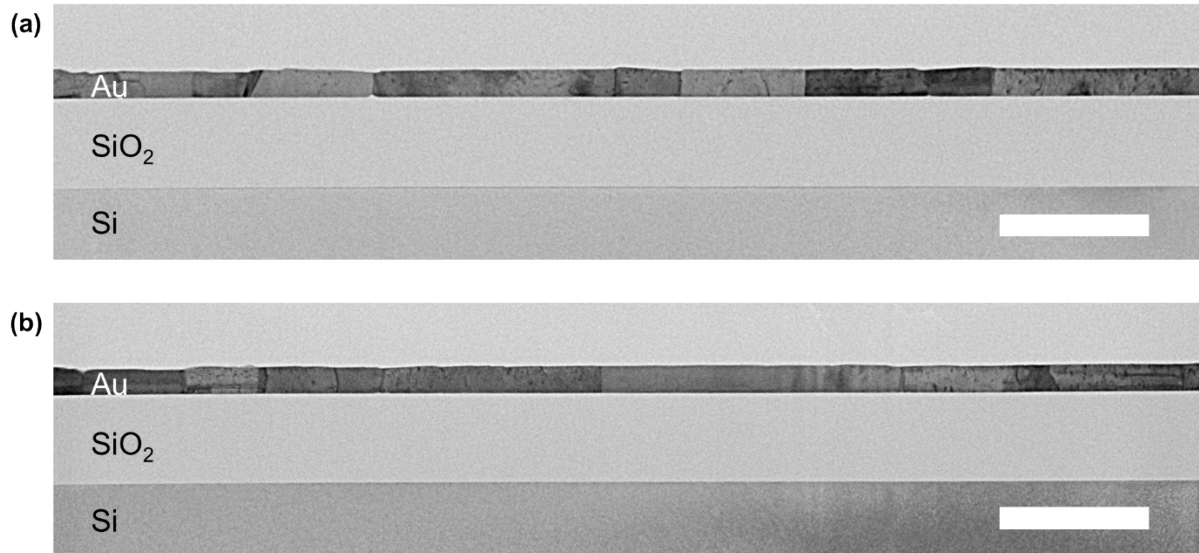

Supplement: c9nr05119h1.pdf [file c9nr05119h1.pdf]
